# Supplementary material for: Pathways explaining racial/ethnic and socio-economic disparities in dementia incidence: the UK Biobank study
Source: publisher site journal article supplement (doi:10.18632/aging.205058), 2023-09-25
Supplement: Supplementary file [file aging-v15i18-205058-supplementary-material-SD2.pdf]

## SUPPLEMENTARY FIGURES

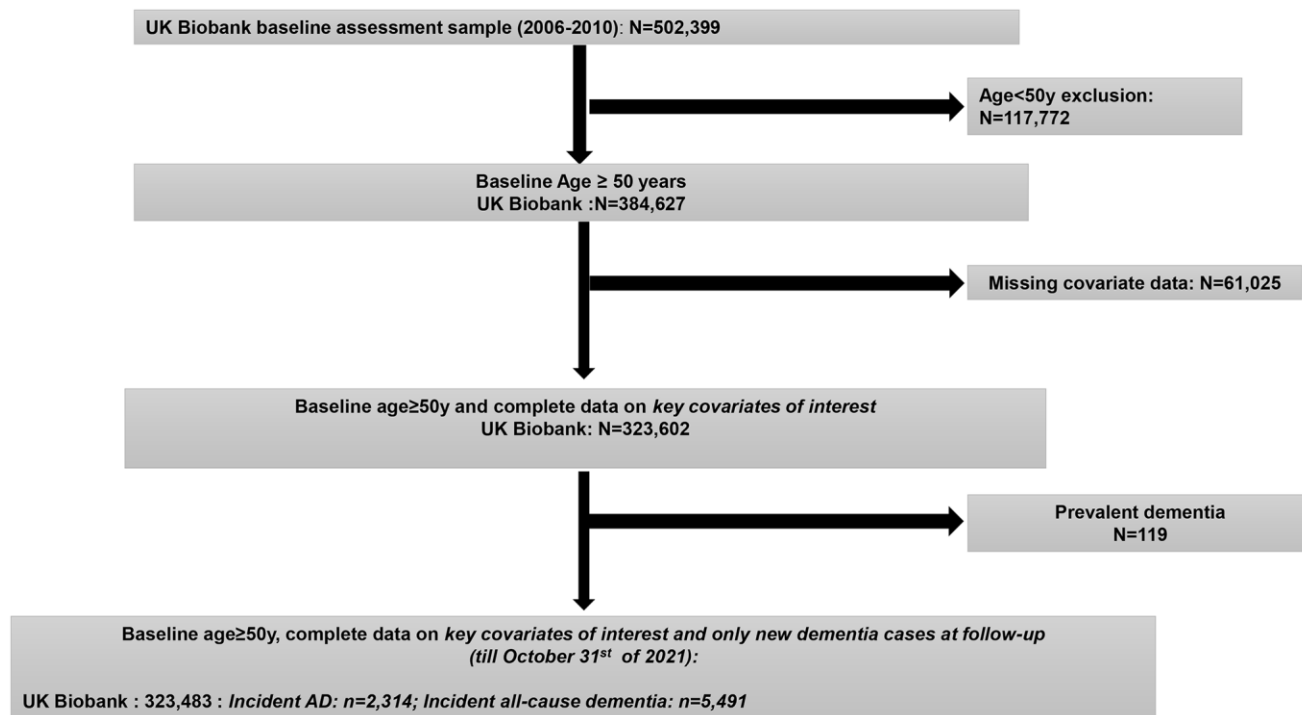

**Supplementary Figure 1. Participant flowchart: The UK biobank 2006–2021.** Abbreviations: AD: Alzheimer’s disease; N: Sample size; UK: United Kingdom.

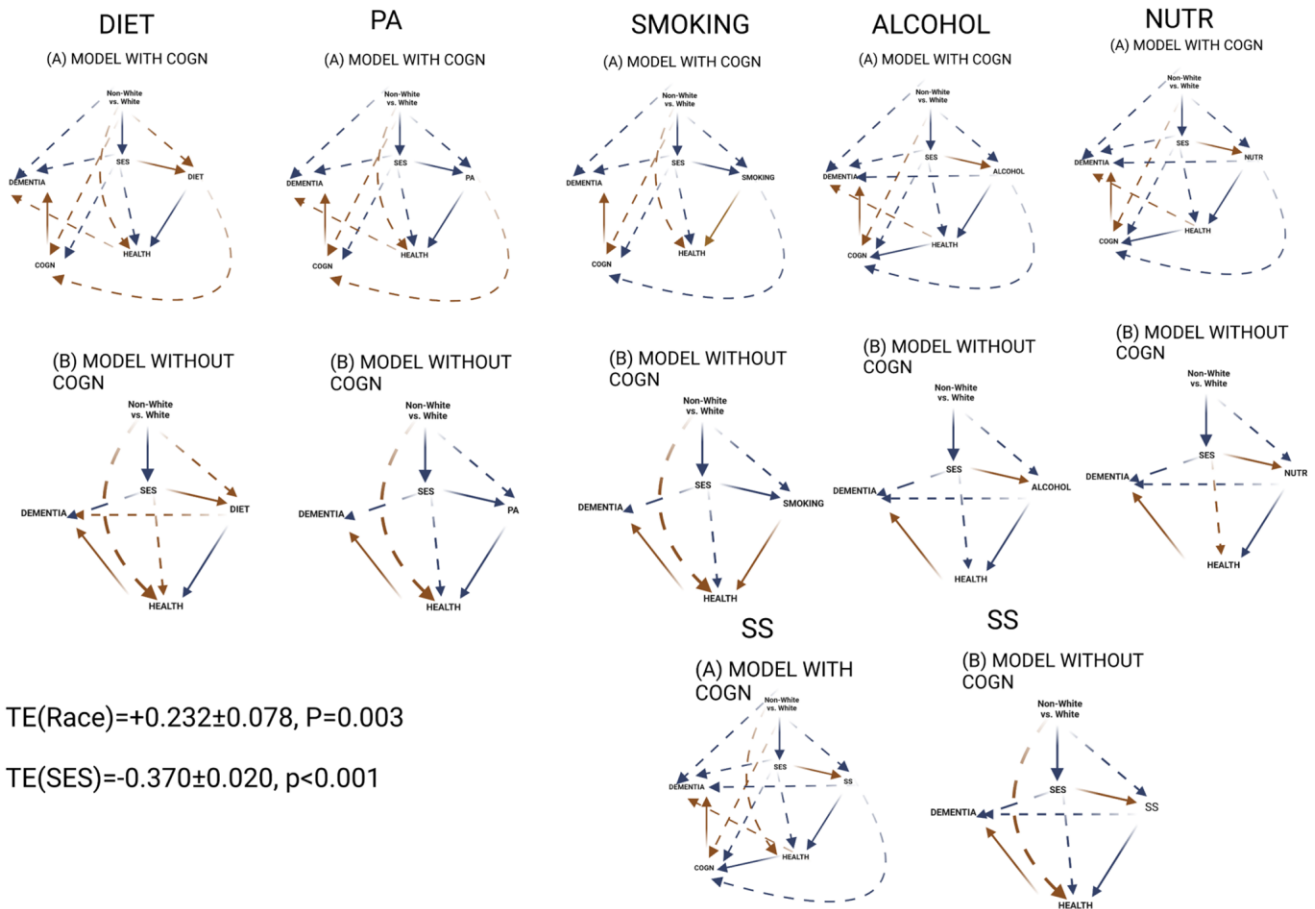

**Supplementary Figure 2. GSEM findings from models with alternative mediators, HEALTH and COGN.** Abbreviations: AD: Alzheimer’s Disease; ALCOHOL: Alcohol consumption z-score; COGN: Poor cognitive performance z-score; DIET: diet quality z-score; HEALTH: Poor cardio-metabolic and general health z-score; PA: Physical Activity z-score; NUTR: Nutritional biomarker z-score; SES: Socio-economic status z-score; SMOKING: Smoking z-score; SS: Social Support z-score; TE: Total Effect. Red lines: Positive associations; Blue lines: Inverse associations; Solid lines: Within hypothesized pathway; Dashed lines: Outside hypothesized pathway.
