# Supplementary material for: Pathways explaining racial/ethnic and socio-economic disparities in dementia incidence: the UK Biobank study
Source: publisher site journal article supplement (doi:10.18632/aging.205058), 2023-09-25
Supplement: Supplementary file [file aging-v15i18-205058-supplementary-material-SD3.pdf]

## SUPPLEMENTARY TABLES

**Supplementary Table 1. Proration of mediators including LE8 sub-scales.**

| Items | Number of missing items/participant allowed for prorating |
|-------|-----------------------------------------------------------|
| 1     | 0                                                         |
| 2     | 1                                                         |
| 3     | 1                                                         |
| 4     | 2                                                         |
| 5     | 2                                                         |
| 6     | 3                                                         |
| 7     | 3                                                         |
| 8     | 4                                                         |
| 9     | 4                                                         |
| 10    | 5                                                         |
| 11    | 5                                                         |
| 12    | 6                                                         |

**Supplementary Table 2. Goals and guidelines used to construct the healthy diet score.**

| Consume more                                                              | Goal*                                    | One serving equals...                                                                                                     |
|---------------------------------------------------------------------------|------------------------------------------|---------------------------------------------------------------------------------------------------------------------------|
| <b>Fruits</b>                                                             | 3 servings/d                             | 1 medium-sized fruit; ½ cup of fresh, frozen, or unsweetened canned fruit; ½ cup of dried fruit; ½ cup of 100% juice      |
| <b>Nuts, seeds</b>                                                        | 4 servings/wk                            | 1 ounce                                                                                                                   |
| <b>Vegetables, including legumes (excluding russet or white potatoes)</b> | 3 servings/d                             | 1 cup of raw leafy vegetables; ½ cup of cut-up raw vegetables, cooked vegetables, or 100% vegetable juice                 |
| <b>Whole grains<sup>†</sup></b>                                           | 3 servings/d, in place of refined grains | 1 slice of whole-grain bread; 1 cup of high-fiber, whole-grain cereal; ½ cup of cooked whole-grain rice, pasta, or cereal |
| <b>Fish, shellfish</b>                                                    | ≥2 servings/wk                           | 3.5 ounces (100 g)                                                                                                        |
| <b>Dairy products, especially yogurt and cheese<sup>‡</sup></b>           | 2–3 servings/d                           | 1 cup of milk or yogurt; 1 ounce of cheese                                                                                |
| <b>Vegetable oils</b>                                                     | 2–6 servings/d                           | 1 teaspoon oil, 1 tablespoon vegetable spread                                                                             |
| <b>Consume less</b>                                                       |                                          |                                                                                                                           |
| <b>Refined grains, starches, added sugars<sup>†</sup></b>                 | No more than 1–2 servings/d              |                                                                                                                           |
| <b>Processed meats</b>                                                    | No more than 1 serving/wk                | 1.75 ounces (50 g)                                                                                                        |
| <b>Unprocessed red meats</b>                                              | No more than 1–2 servings/wk             | 3.5 ounces (100 g)                                                                                                        |
| <b>Industrial trans fat<sup>§</sup></b>                                   | Don't eat                                | Any food containing or made with partially hydrogenated vegetable oil                                                     |
| <b>Sugar-sweetened beverages</b>                                          | Don't drink                              | 8 ounces of beverage; 1 small sweet, pastry, or dessert                                                                   |
| <b>Sodium</b>                                                             | No more than 2000 mg/d                   | n/a                                                                                                                       |

Source: <https://www.ahajournals.org/doi/10.1161/CIRCULATIONAHA.115.018585#d3e341>. \*Based on a 2000 kcal/d diet. Servings should be adjusted accordingly for higher or lower energy consumption. †As a practical rule-of-thumb for selecting healthful whole grains and avoiding carbohydrate-rich products high in starches and added sugars, the ratio of total carbohydrate to dietary fiber (g/serving of each) appears useful. Foods with ratios <10:1 are preferable; i.e., food containing

at least 1 g of fiber for every 10 g of total carbohydrate. In addition, minimally processed whole grains (e.g., steel-cut oats, stone-ground bread) are generally preferable to finely milled whole grains (e.g., many commercial whole-grain breads and breakfast cereals) because of the larger glycemic responses of the latter. <sup>4</sup>Current evidence does not permit clear differentiation of whether low-fat or whole-fat products are superior for cardiometabolic health. Other characteristics, such as probiotic content or fermentation, may be far more relevant than fat content. <sup>5</sup>The US Food and Drug Administration recently ruled that the use of partially hydrogenated vegetable oils is no longer “generally regarded as safe,” which should effectively eliminate the majority of industrial trans fats from the US food supply. Several countries including Denmark, Argentina, Austria, Iceland, and Switzerland have effectively eliminated the use of partially hydrogenated vegetable oils through direct legislation on the amounts of allowable trans fats in foods. Small amounts of certain trans fatty acids may be formed through other industrial processes, including oil deodorization and high-temperature cooking; the health effects of these trace industrial trans fats require careful investigation.

**Supplementary Table 3. Healthy Diet Index, HDI, using touchscreen questionnaire in the UK Biobank study<sup>†,§</sup>.**

| <b>Food group/<br/>nutrient item</b>                      | <b>UKB fields used</b> | <b>Definition of meeting criterion</b>                                                                                                                                                                                                                                         | <b>Criteria and scoring</b>                       |
|-----------------------------------------------------------|------------------------|--------------------------------------------------------------------------------------------------------------------------------------------------------------------------------------------------------------------------------------------------------------------------------|---------------------------------------------------|
| <b>Consume more</b>                                       |                        |                                                                                                                                                                                                                                                                                |                                                   |
| <i>Fruits, fresh or dried</i>                             | 1309 and 1319          | ≥3 servings per day including fresh and dried fruits<br>1 piece of dried fruit (e.g., apricot) ≈2.5 TBSP, 1 TBSP: 0.063 cups; ½ cup of dried fruit (1 serving) is 3 pieces of dried fruit.<br>1 medium sized fruit is one serving.                                             | 1: meets criterion,<br>0: does not meet criterion |
| <i>Vegetables, salad/cooked</i>                           | 1289 and 1299          | ≥3 servings per day<br>Including salad, raw and cooked<br>1 cup of raw leafy vegetables is 16 TBSP. ½ cup of cooked or non-leafy raw vegetables is 8 TBSP.<br>1 serving of raw leafy or non-leafy vegetables is on average ≈12 TBSP; 1 serving of cooked vegetables is ≈8 TBSP | 1: meets criterion,<br>0: does not meet criterion |
| <i>Whole grains</i>                                       |                        | ≥3 servings per day                                                                                                                                                                                                                                                            | 1: meets criterion,<br>0: does not meet criterion |
| <b>Slices of bread</b>                                    | 1438 and 1448          | Daily slices of wholemeal or wholegrain bread (servings per day), convert from weekly slices.                                                                                                                                                                                  |                                                   |
| <b>Cereal</b>                                             | 1458 and 1448          | Daily bowls of whole wheat cereal as servings/day (bran cereal, biscuit cereal, oat cereal and muesli), convert from weekly bowls.                                                                                                                                             |                                                   |
| <i>Fish shellfish</i>                                     | 1329 and 1339          | Sum weekly frequencies to obtain total servings/week.<br>≥2 servings/wk                                                                                                                                                                                                        | 1: meets criterion,<br>0: does not meet criterion |
| <b>Oily fish</b>                                          | ...                    | ...                                                                                                                                                                                                                                                                            |                                                   |
| <b>Non-oily fish</b>                                      | ...                    | ...                                                                                                                                                                                                                                                                            |                                                   |
| <i>Dairy products</i>                                     | 6114, 1408 and 1418    | Reporting consumption of two milk items and eating cheese once a day to meet the 2–3 servings/day criterion.                                                                                                                                                                   | 1: meets criterion,<br>0: does not meet criterion |
| <b>Milk</b>                                               | ...                    |                                                                                                                                                                                                                                                                                |                                                   |
| <b>Cheese</b>                                             | ...                    |                                                                                                                                                                                                                                                                                |                                                   |
| <i>Vegetable oil</i>                                      | 2654                   | Reporting use of olive oil or polyunsaturated/sunflower oil (yes: 1, 0: no)                                                                                                                                                                                                    | 1: meets criterion,<br>0: does not meet criterion |
| <b>Consume less</b>                                       |                        |                                                                                                                                                                                                                                                                                |                                                   |
| <i>Refined grains, starches, added sugars<sup>†</sup></i> | 1438 and 1448          | Follow a similar coding scheme as for whole grains but select non-whole grains;<br><1.5 servings per day                                                                                                                                                                       | 1: meets criterion,<br>0: does not meet criterion |
| <i>Processed meats</i>                                    | 1349                   | Once a week or less would meet the criterion.                                                                                                                                                                                                                                  | 1: meets criterion,                               |



|                       |                        |                                                                                                                                                                           |                                                                                                                                                                                                                                                                                                                                                                                                                    |
|-----------------------|------------------------|---------------------------------------------------------------------------------------------------------------------------------------------------------------------------|--------------------------------------------------------------------------------------------------------------------------------------------------------------------------------------------------------------------------------------------------------------------------------------------------------------------------------------------------------------------------------------------------------------------|
| <b>Health Factors</b> | <b>Body mass index</b> | <b>Measurement:</b> Body weight (kg) divided by height squared (m <sup>2</sup> )<br><b>Example tools for measurement:</b> Objective measurement of height and weight      | <b>Metric: Body mass index (kg/m<sup>2</sup>)</b><br><b>Scoring:</b><br>Points Level<br>100 <25<br>70 25.0 – 29.9<br>30 30.0 – 34.9<br>15 35.0 – 39.9<br>0 ≥ 40.0                                                                                                                                                                                                                                                  |
|                       | <b>Blood lipids</b>    | <b>Measurement:</b> Plasma total and HDL-cholesterol with calculation of non-HDL-cholesterol<br><b>Example tools for measurement:</b> Fasting or non-fasting blood sample | <b>Metric: Non-HDL-cholesterol (mg/dL)</b><br><b>Scoring:</b><br>Points Level<br>100 <130<br>60 130 – 159<br>40 160 – 189<br>20 190 – 219<br>0 ≥220<br>If drug-treated level, subtract 20 points                                                                                                                                                                                                                   |
|                       | <b>Blood glucose</b>   | <b>Measurement: Fasting blood glucose or casual hemoglobin A1c</b> <b>Example tools for measurement: Fasting (FBG, HbA1c) or non- fasting (HbA1c) blood sample</b>        | <b>Metric: Fasting blood glucose (mg/dL) or Hemoglobin A1c (%)</b><br><b>Scoring:</b><br>Points Level<br>100 No history of diabetes and FBG <100 (or HbA1c < 5.7)<br>60 No diabetes and FBG 100 – 125 (or HbA1c 5.7–6.4) (Pre-diabetes)<br>40 Diabetes with HbA1c <7.0<br>30 Diabetes with HbA1c 7.0 – 7.9<br>20 Diabetes with HbA1c 8.0 – 8.9<br>10 Diabetes with Hb A1c 9.0 – 9.9<br>0 Diabetes with HbA1c ≥10.0 |
|                       | <b>Blood pressure</b>  | <b>Measurement:</b> Appropriately measured systolic and diastolic blood pressure<br><b>Example tools for measurement:</b> Appropriately sized blood pressure cuff         | <b>Metric: Systolic and diastolic blood pressure (mm Hg)</b><br><b>Scoring:</b><br>Points Level<br>100 <120/<80 (Optimal)<br>75 120–129/<80 (Elevated)<br>50 130–139 or 80–89 (Stage I HTN)<br>25 140–159 or 90–99<br>0 ≥ 160 or ≥100                                                                                                                                                                              |

**Supplementary Table 5. Allostatic load indicator criteria [15].**

|                               | <b>High-risk clinical</b>              |
|-------------------------------|----------------------------------------|
| Albumin (g/dL)                | <3.8 [16]                              |
| C-reactive protein (mg/dL)    | ≥0.3 [17]                              |
| Waist: Hip Ratio              | >0.9 for males; >0.85 for females [18] |
| Total cholesterol (mg/dL)     | ≥240 [19]                              |
| HDL-C (mg/dL)                 | <40 [19]                               |
| Glycated hemoglobin (%)       | ≥6.4 [20, 21]                          |
| Resting heart rate (beat/min) | ≥90 [22]                               |
| Systolic BP                   | ≥140 [23]                              |
| Diastolic BP                  | ≥90 [23]                               |

Abbreviations: BP: Blood Pressure; HDL: High Density Lipoprotein-Cholesterol.

Supplementary Table 6. Study sample characteristics by sex: The UK Biobank 2006–2021<sup>a</sup>.

| Study sample characteristics                                       | Males,<br>n = 148,958 |                |                |        | Females,<br>n = 173,525 |                |                |        | P <sub>sex</sub> |
|--------------------------------------------------------------------|-----------------------|----------------|----------------|--------|-------------------------|----------------|----------------|--------|------------------|
|                                                                    | All males             | White          | Non-White      | P      | All females             | White          | Non-White      | P      |                  |
| <b>Socio-demographic</b>                                           |                       |                |                |        |                         |                |                |        |                  |
| Baseline age, y                                                    | 60.7 ± 5.4            | 60.8 ± 5.4     | 59.1 ± 5.7     | <0.001 | 60.1 ± 5.4              | 60.2 ± 5.4     | 58.1 ± 5.5     | <0.001 | <0.001           |
| Sex, % female                                                      | 0.0                   | 0.0            | 0.0            | —      | 100.0                   | 100.0          | 100.0          | —      | —                |
| <b>Race/ethnicity</b>                                              |                       |                |                |        |                         |                |                |        |                  |
| White                                                              | 96.4                  | 100.0          | 0.0            | —      | 96.4                    | 100.0          | 0.0            | —      | <0.001           |
| Black                                                              | 0.8                   | 0.0            | 22.6           | —      | 1.0                     | 0.0            | 27.5           | —      | —                |
| South Asian                                                        | 1.4                   | 0.0            | 39.8           | —      | 1.0                     | 0.0            | 28.3           | —      | <0.001           |
| Other                                                              | 1.4                   | 0.0            | 37.6           | —      | 1.6                     | 0.0            | 44.2           | —      | 0.45             |
| Household size                                                     | 2.3 ± 1.2             | 2.3 ± 1.1      | 2.9 ± 1.5      | <0.001 | 2.2 ± 1.2               | 2.1 ± 1.1      | 2.6 ± 1.7      | <0.001 | <0.001           |
| <b>Socio-economic status</b>                                       |                       |                |                |        |                         |                |                |        |                  |
| <b>Education</b>                                                   |                       |                |                |        |                         |                |                |        |                  |
| Low                                                                | 24.1                  | 24.2           | 21.6           | —      | 19.8                    | 19.6           | 24.9           | —      | —                |
| Intermediate                                                       | 34.8                  | 35.1           | 27.9           | 0.001  | 43.7                    | 44.2           | 32.1           | <0.001 | <0.001           |
| High                                                               | 41.1                  | 40.7           | 51.4           | <0.001 | 36.5                    | 36.2           | 43.0           | <0.001 | <0.001           |
| <b>Income</b>                                                      |                       |                |                |        |                         |                |                |        |                  |
| Less than £18,000                                                  | 22.6                  | 22.4           | 28.1           | —      | 27.8                    | 27.7           | 32.3           | —      | —                |
| £18,000–£29,999                                                    | 26.9                  | 26.9           | 27.3           | —      | 29.0                    | 29.0           | 28.3           | —      | —                |
| £30,000–£51,999                                                    | 25.8                  | 25.9           | 22.8           | —      | 24.0                    | 24.0           | 22.2           | —      | —                |
| £52,000–£100,000                                                   | 19.5                  | 19.6           | 16.7           | —      | 15.5                    | 15.5           | 13.6           | —      | —                |
| greater than £100,000                                              | 5.2                   | 5.2            | 5.1            | —      | 3.7                     | 3.7            | 3.6            | —      | —                |
| TDI                                                                | -1.54 ± 2.99          | -1.62 ± 2.9    | 0.41 ± 3.53    | <0.001 | -1.57 ± 2.91            | -1.65 ± 2.85   | 0.53 ± 3.43    | <0.001 | 0.013            |
| SES z-score                                                        | -0.01 ± 0.73          | 0.00 ± 0.72    | -0.23 ± 0.80   | <0.001 | -0.05 ± 0.68            | -0.03 ± 0.68   | -0.33 ± 0.78   | <0.001 | <0.001           |
| <b>Lifestyle factors</b>                                           |                       |                |                |        |                         |                |                |        |                  |
| <b>Smoking</b>                                                     |                       |                |                |        |                         |                |                |        |                  |
| <b>Smoking status</b>                                              |                       |                |                |        |                         |                |                |        |                  |
| Never                                                              | 78.5                  | 78.4           | 81.4           | —      | 83.8                    | 83.6           | 89.9           | —      | —                |
| Former                                                             | 10.6                  | 10.8           | 5.4            | <0.001 | 8.5                     | 8.7            | 3.1            | <0.001 | <0.001           |
| Current                                                            | 10.9                  | 10.8           | 13.2           | <0.001 | 7.7                     | 7.8            | 7.1            | 0.001  | <0.001           |
| Environmental tobacco smoke                                        | 0.97 ± 5.4            | 0.97 ± 5.4     | 1.02 ± 4.72    | 0.48   | 0.81 ± 5.1              | 0.80 ± 5.1     | 1.04 ± 4.73    | <0.001 | <0.001           |
| Pack-years of tobacco smoke                                        | 0.10 ± 0.30           | 0.10 ± 0.30    | 0.07 ± 0.22    | <0.001 | 0.07 ± 0.22             | 0.07 ± 0.22    | 0.04 ± 0.16    | <0.001 | <0.001           |
| SMOKING z-score                                                    | -0.002 ± 0.481        | -0.000 ± 0.482 | -0.050 ± 0.454 | <0.001 | -0.008 ± 0.405          | -0.008 ± 0.406 | -0.004 ± 0.383 | 0.51   | <0.001           |
| <b>Alcohol consumption</b>                                         |                       |                |                |        |                         |                |                |        |                  |
| <b>Alcohol consumption frequency</b>                               |                       |                |                |        |                         |                |                |        |                  |
| 0 "never"                                                          | 5.5                   | 4.9            | 21.2           | —      | 8.8                     | 8.1            | 27.4           | —      | —                |
| 1 "special occasions only"                                         | 6.8                   | 6.5            | 16.5           | <0.001 | 14.8                    | 14.2           | 30.0           | <0.001 | <0.001           |
| 2 "1–3 times per month"                                            | 8.0                   | 8.0            | 10.1           | <0.001 | 12.5                    | 12.5           | 11.6           | <0.001 | 0.020            |
| 3 "1–3 times per week"                                             | 24.5                  | 24.6           | 21.4           | <0.001 | 25.0                    | 25.3           | 15.4           | <0.001 | <0.001           |
| 4 "3–4 times per week"                                             | 26.8                  | 27.2           | 15.6           | <0.001 | 21.6                    | 21.5           | 8.9            | <0.001 | <0.001           |
| 5 "daily or almost daily"                                          | 28.4                  | 28.9           | 15.2           | <0.001 | 17.9                    | 18.4           | 6.8            | <0.001 | <0.001           |
| ALCOHOL z-score                                                    | +0.20 ± 0.94          | 0.23 ± 0.92    | -0.49 ± 1.15   | <0.001 | -0.17 ± 1.00            | -0.14 ± 1.00   | -0.96 ± 1.02   | <0.001 | <0.001           |
| <b>Physical activity, PA</b>                                       |                       |                |                |        |                         |                |                |        |                  |
| PA, Met.min.wk <sup>-1</sup>                                       | 2,169 ± 3,189         | 2,180 ± 3,194  | 1,853 ± 3,023  | <0.001 | 1,787 ± 2,437           | 1,790 ± 2,431  | 1,703 ± 2,580  | 0.005  | —                |
| PA z-score                                                         | 0.07 ± 1.13           | 0.08 ± 1.13    | -0.039 ± 1.07  | <0.001 | -0.06 ± 0.86            | -0.06 ± 0.86   | -0.09 ± 0.92   | 0.005  | <0.001           |
| <b>Diet quality</b>                                                |                       |                |                |        |                         |                |                |        |                  |
| HDI total score                                                    | 4.81 ± 1.56           | 4.79 ± 1.57    | 5.13 ± 1.49    | <0.001 | 5.37 ± 1.39             | 5.36 ± 1.39    | 5.57 ± 1.35    | <0.001 | <0.001           |
| DIET z-score                                                       | -0.20 ± 1.04          | -0.21 ± 1.04   | +0.01 ± 0.99   | <0.001 | +0.17 ± 0.93            | 0.17 ± 0.93    | 0.31 ± 0.90    | <0.001 | <0.001           |
| <b>Nutritional Biomarkers</b>                                      |                       |                |                |        |                         |                |                |        |                  |
| 25-hydroxyvitamin D                                                | 49.7 ± 21.1           | 50.3 ± 20.9    | 33.8 ± 17.9    | <0.001 | 49.6 ± 20.7             | 50.0 ± 20.6    | 36.9 ± 18.1    | <0.001 | 0.016            |
| Red cell distribution width                                        | 13.5 ± 0.9            | 13.5 ± 0.9     | 13.7 ± 1.1     | <0.001 | 13.5 ± 1.0              | 13.5 ± 0.9     | 13.9 ± 1.3     | <0.001 | 0.002            |
| NUTR z-score                                                       | 0.004 ± 0.733         | +0.023 ± 0.723 | -0.500 ± 0.823 | <0.001 | -0.005 ± 0.777          | 0.013 ± 0.766  | -0.49 ± 0.91   | <0.001 | 0.001            |
| <b>Social Support</b>                                              |                       |                |                |        |                         |                |                |        |                  |
| "How often do you visit friends or family or have them visit you?" | 5.09 ± 1.16           | 5.10 ± 1.16    | 4.81 ± 1.20    | <0.001 | 5.42 ± 1.09             | 5.44 ± 1.08    | 4.86 ± 1.21    | <0.001 | <0.001           |
| "How often are you able to confide in someone close to you?"       | 1.00 ± 0.83           | 1.00 ± 0.83    | 0.91 ± 0.80    | <0.001 | 1.08 ± 0.90             | 1.08 ± 0.90    | 0.98 ± 0.85    | <0.001 | <0.001           |
| "Which of the following do you attend once a week or more often?"  | 3.43 ± 2.02           | 3.44 ± 2.02    | 2.93 ± 2.04    | <0.001 | 3.65 ± 1.76             | 3.67 ± 1.75    | 3.12 ± 1.92    | <0.001 | <0.001           |
| SS z-score                                                         | -0.089 ± 0.645        | -0.082 ± 0.642 | -0.293 ± 0.671 | <0.001 | 0.075 ± 0.614           | 0.086 ± 0.609  | -0.221 ± 0.664 | <0.001 | <0.001           |
| <b>Cardio-metabolic and general health-related factors</b>         |                       |                |                |        |                         |                |                |        |                  |
| Body mass index, kg.m <sup>-1</sup>                                | 27.9 ± 4.2            | 27.9 ± 4.2     | 27.5 ± 4.1     | <0.001 | 27.2 ± 5.1              | 27.1 ± 5.0     | 28.1 ± 5.6     | <0.001 | <0.001           |
| Allostatic load                                                    | 2.42 ± 1.35           | 2.41 ± 1.35    | 2.46 ± 1.38    | 0.019  | 1.83 ± 1.35             | 1.82 ± 1.34    | 2.02 ± 1.40    | <0.001 | <0.001           |
| Co-morbidity index                                                 | 2.07 ± 1.86           | 2.07 ± 1.86    | 2.08 ± 1.84    | 0.91   | 2.15 ± 2.00             | 2.15 ± 2.01    | 2.16 ± 1.98    | 0.50   | <0.001           |

|                                         |                  |                  |                                         |        |                  |                  |                                       |        |        |
|-----------------------------------------|------------------|------------------|-----------------------------------------|--------|------------------|------------------|---------------------------------------|--------|--------|
| <b>Self-rated health</b>                |                  |                  |                                         | <0.001 |                  |                  |                                       | <0.001 | <0.001 |
| <b>Excellent</b>                        | 15.8             | 16.0             | 11.9                                    |        | 17.1             | 17.4             | 10.7                                  |        |        |
| <b>Good</b>                             | 56.9             | 57.0             | 52.4                                    |        | 60.8             | 61.1             | 53.9                                  |        |        |
| <b>Fair</b>                             | 22.5             | 22.2             | 28.8                                    |        | 18.7             | 18.3             | 28.8                                  |        |        |
| <b>Poor</b>                             | 4.9              | 4.8              | 6.9                                     |        | 3.4              | 3.3              | 6.6                                   |        |        |
| <b>HEALTH z-score</b>                   | 0.077 ± 0.660    | 0.076 ± 0.661    | 0.117 ± 0.650                           | <0.001 | -0.066 ± 0.704   | -0.072 ± 0.702   | 0.104 ± 0.743                         | <0.001 | <0.001 |
| <b>Cognitive performance</b>            |                  |                  |                                         |        |                  |                  |                                       |        |        |
| <b>Reaction Time</b>                    | 6.31 ± 0.19      | 6.31 ± 0.18      | 6.40 ± 0.22                             | <0.001 | 6.34 ± 0.18      | 6.34 ± 0.18      | 6.42 ± 0.22                           | <0.001 | <0.001 |
| <b>Pairs matching, errors</b>           | 0.71 ± 0.71      | 0.70 ± 0.70      | 1.00 ± 0.75                             | <0.001 | 0.72 ± 0.69      | 0.71 ± 0.69      | 0.99 ± 0.71                           | <0.001 | <0.001 |
| <b>Pairs matching, time to complete</b> | 5.34 ± 0.37      | 5.33 ± 0.37      | 5.57 ± 0.47                             | <0.001 | 5.36 ± 0.37      | 5.35 ± 0.36      | 5.58 ± 0.46                           | <0.001 | <0.001 |
| <b>COGN z-score</b>                     | -0.043 ± 0.764   | -0.062 ± 0.750   | +0.456 ± 0.940                          | <0.001 | 0.037 ± 0.746    | 0.019 ± 0.73     | 0.504 ± 0.896                         | <0.001 | <0.001 |
| <b>LES</b>                              |                  |                  |                                         |        |                  |                  |                                       |        |        |
| <b>Total score</b>                      | 493.3 ± 93.0     | 493.7 ± 93.0     | 483.7 ± 94.0                            | <0.001 | 510.1 ± 97.1     | 510.8 ± 97.1     | 493.2 ± 96.1                          | <0.001 | <0.001 |
| <b>Biological score</b>                 | 243.7 ± 62.0     | 243.8 ± 61.9     | 239.5 ± 64.3                            | <0.001 | 248.7 ± 69.0     | 249.3 ± 68.3     | 233.1 ± 73.7                          | <0.001 | <0.001 |
| <b>Lifestyle score</b>                  | 249.6 ± 63.8     | 249.8 ± 63.7     | 243.9 ± 64.9                            | <0.001 | 261.2 ± 62.3     | 261.3 ± 62.3     | 258.7 ± 60.8                          | 0.001  | <0.001 |
| <b>Incidence proportion</b>             |                  |                  |                                         |        |                  |                  |                                       |        |        |
| <b>All-cause dementia</b>               | 1.99 (n = 2,980) | 1.99 (n = 2,882) | 1.81 (n = 98)                           | 0.34   | 1.45 (n = 2,511) | 1.46 (n = 2,439) | 1.14 (n = 72)                         | 0.040  | <0.001 |
| <b>AD dementia</b>                      | 0.76 (n = 1,147) | 0.77 (n = 1,111) | 0.66 (n = 36)                           | 0.39   | 0.67 (n = 1,167) | 0.68 (n = 1,134) | 0.53 (n = 33)                         | 0.14   | 0.002  |
| <b>Incident rates, per 100,000 P-Y</b>  |                  |                  |                                         |        |                  |                  |                                       |        |        |
| <b>All-cause dementia</b>               | 164              | 164              | 214 (Black)<br>132 (SA)<br>134 (Others) |        | 117              | 117              | 130 (Black)<br>74 (SA)<br>85 (Others) | —      | —      |
| <b>AD dementia</b>                      | 63               | 63               | 69 (Black)<br>58 (SA)<br>45 (Others)    |        | 54               | 54               | 63 (Black)<br>41 (SA)<br>32 (Others)  | —      | —      |

Abbreviations: AD: Alzheimer's Disease; ALCOHOL: Alcohol consumption z-score; COGN: Poor cognitive performance z-score; DIET: diet quality z-score; HEALTH: Poor cardio-metabolic and general health z-score; PA: Physical Activity z-score; NUTR: Nutritional biomarker z-score; SES: Socio-economic status z-score; SMOKING: Smoking z-score; SS: Social Support z-score. <sup>a</sup>Values are means +/- SD or percentages.

### Supplementary Table 7. Generalized Structural Equations models (GSEM) for racial/ethnic disparities in all-cause dementia: mediation through SES, alternative lifestyle factors (LIFESTYLE), health-related factors (HEALTH) and cognitive performance (COGN): The UK Biobank 2006–2021<sup>a</sup>.

|                                                                    | LIFESYLTE           |                       |                       |                     |                     |                      |
|--------------------------------------------------------------------|---------------------|-----------------------|-----------------------|---------------------|---------------------|----------------------|
|                                                                    | DIET                | PA                    | SMOKING               | ALCOHOL             | NUTR                | SS                   |
| <i>Main pathway</i>                                                |                     |                       |                       |                     |                     |                      |
| RACE_ETHN → SES (β <sub>12</sub> )                                 | -0.351 ± 0.006***   | -0.351 ± 0.006***     | -0.351 ± 0.006***     | -0.351 ± 0.006***   | -0.351 ± 0.006***   | -0.351 ± 0.006***    |
| SES → LIFESTYLE (β <sub>23</sub> )                                 | +0.192 ± 0.003***   | -0.059 ± 0.003***     | -0.152 ± 0.002***     | +0.305 ± 0.002***   | +0.102 ± 0.002***   | +0.086 ± 0.002***    |
| LIFESTYLE → HEALTH (β <sub>34</sub> )                              | -0.081 ± 0.001***   | -0.091 ± 0.001***     | +0.046 ± 0.002***     | -0.094 ± 0.001***   | -0.168 ± 0.002***   | -0.063 ± 0.002***    |
| HEALTH → COGN (β <sub>45</sub> )                                   | -0.002 ± 0.002      | -0.001 ± 0.002        | -0.003 ± 0.002        | -0.010 ± 0.002***   | -0.007 ± 0.002***   | -0.006 ± 0.002***    |
| COGN → DEMENTIA (β <sub>56</sub> )                                 | +0.416 ± 0.017***   | +0.416 ± 0.017***     | +0.416 ± 0.017***     | +0.412 ± 0.017***   | +0.414 ± 0.017***   | +0.410 ± 0.017***    |
| <i>Selected direct effects on final outcomes</i>                   |                     |                       |                       |                     |                     |                      |
| RACE_ETHN → DEMENTIA (β <sub>16</sub> )                            | -0.167 ± 0.080*     | -0.156 ± 0.079*       | -0.157 ± 0.079*       | -0.202 ± 0.080*     | -0.209 ± 0.080**    | -0.184 ± 0.079*      |
| SES → DEMENTIA (β <sub>26</sub> )                                  | -0.220 ± 0.020***   | -0.215 ± 0.020***     | -0.216 ± 0.020***     | -0.196 ± 0.020***   | -0.209 ± 0.020***   | -0.203 ± 0.020*      |
| LIFESTYLE → DEMENTIA (β <sub>36</sub> )                            | +0.026 ± 0.014      | +0.011 ± 0.013        | -0.004 ± 0.019        | -0.075 ± 0.014***   | -0.111 ± 0.017***   | -0.163 ± 0.021***    |
| HEALTH → DEMENTIA (β <sub>46</sub> )                               | +0.408 ± 0.019***   | +0.407 ± 0.019***     | +0.404 ± 0.019***     | +0.388 ± 0.019***   | +0.378 ± 0.020***   | +0.395 ± 0.019***    |
| <i>Other effects between endogenous variables</i>                  |                     |                       |                       |                     |                     |                      |
| SES → HEALTH (β <sub>24</sub> )                                    | -0.211 ± 0.002***   | -0.232 ± 0.002***     | -0.219 ± 0.002***     | -0.198 ± 0.002***   | -0.209 ± 0.002***   | -0.221 ± 0.002***    |
| SES → COGN (β <sub>25</sub> )                                      | -0.135 ± 0.002***   | -0.131 ± 0.002***     | -0.136 ± 0.002***     | -0.125 ± 0.002***   | -0.132 ± 0.002***   | -0.131 ± 0.002***    |
| LIFESTYLE → COGN (β <sub>35</sub> )                                | +0.015 ± 0.001***   | +0.016 ± 0.001***     | -0.023 ± 0.002***     | -0.029 ± 0.001***   | -0.014 ± 0.0017***  | -0.131 ± 0.002***    |
| <i>Other direct effects of race</i>                                |                     |                       |                       |                     |                     |                      |
| RACE_ETHN → LIFESTYLE (β <sub>13</sub> )                           | +0.257 ± 0.009***   | -0.076 ± 0.009***     | -0.103 ± 0.007***     | -0.675 ± 0.009***   | -0.482 ± 0.007***   | -0.217 ± 0.006***    |
| RACE_ETHN → HEALTH (β <sub>14</sub> )                              | +0.093 ± 0.006***   | +0.065 ± 0.006***     | +0.077 ± 0.006***     | +0.009 ± 0.006      | -0.009 ± 0.006      | +0.059 ± 0.006***    |
| RACE_ETHN → COGN (β <sub>15</sub> )                                | +0.523 ± 0.007***   | +0.528 ± 0.007***     | +0.524 ± 0.007***     | +0.507 ± 0.007***   | +0.521 ± 0.007***   | +0.520 ± 0.007***    |
| <i>Selected Indirect effects</i>                                   |                     |                       |                       |                     |                     |                      |
| RACE_ETHN → SES → DEMENTIA (β <sub>1a</sub> )                      | +0.077 ± 0.007***   | +0.075 ± 0.007***     | +0.076 ± 0.007***     | +0.068 ± 0.007***   | +0.073 ± 0.007***   | +0.071 ± 0.007***    |
| RACE_ETHN → SES → LIFESTYLE → DEMENTIA (β <sub>1b</sub> )          | -0.002 ± 0.001      | +0.0002 ± 0.0003      | -0.0002 ± 0.0010      | +0.0081 ± 0.0015*** | +0.0040 ± 0.0006*** | +0.0050 ± 0.0006***  |
| RACE_ETHN → SES → LIFESTYLE → HEALTH → DEMENTIA (β <sub>1c</sub> ) | +0.0022 ± 0.0001*** | -0.00076 ± 0.00005*** | +0.00099 ± 0.00006*** | +0.0039 ± 0.0002*** | +0.0023 ± 0.0001*** | +0.00075 ± 0.0000*** |

|                                                                         |                       |                        |                       |                       |                      |                       |
|-------------------------------------------------------------------------|-----------------------|------------------------|-----------------------|-----------------------|----------------------|-----------------------|
| RACE_ETHN → SES → LIFESTYLE → HEALTH → COGN → DEMENTIA(β <sub>b</sub> ) | 0.0000 ± 0.0000       | 0.00000 ± 0.00000      | +0.0000 ± 0.0000      | -0.00004 ± 0.0000***  | -0.00002 ± 0.0000*** | +0.0000 ± 0.0000**    |
| RACE_ETHN → SES → LIFESTYLE → COGN → DEMENTIA(β <sub>b</sub> )          | -0.00043 ± 0.00004*** | 0.000136 ± 0.000014*** | -0.00051 ± 0.00005*** | +0.00129 ± 0.00008*** | +0.00021 ± 0.0000*** | +0.00039 ± 0.00003*** |
| RACE_ETHN → SES → COGN → DEMENTIA(β <sub>c</sub> )                      | +0.0197 ± 0.0009***   | 0.0191 ± 0.0009***     | +0.0198 ± 0.0009***   | +0.0181 ± 0.0009***   | +0.0192 ± 0.0009***  | +0.0188 ± 0.0009***   |
| TOTAL EFFECT OF RACE_ETHN                                               | +0.232 ± 0.078**      | +0.232 ± 0.078**       | +0.232 ± 0.078**      | +0.232 ± 0.078**      | +0.232 ± 0.078**     | +0.232 ± 0.078**      |

Abbreviations: AD: Alzheimer's Disease; ALCOHOL: Alcohol consumption z-score; COGN: Poor cognitive performance z-score; DIET: diet quality z-score; HEALTH: Poor cardio-metabolic and general health z-score; NUTR: Nutritional biomarker z-score; PA: Physical Activity z-score; RACE\_ETHN: Racial minority status (Non-White vs. White); SES: Socio-economic status z-score; SMOKING: Smoking z-score; SS: Social Support z-score. <sup>a</sup>Values are path coefficients β ± SE or non-linear combinations of path coefficients to compute selected indirect effects. → DEMENTIA associations are interpreted as Log<sub>e</sub>(HR) of these incident outcomes per unit exposure, as are total effects of RACE\_ETHN. \*P < 0.05 \*\*P < 0.01 \*\*\*P < 0.001 for null hypothesis of β = 0.

### Supplementary Table 8. Generalized Structural Equations models (GSEM) models for racial/ethnic disparities in all-cause dementia: mediation through SES, alternative lifestyle factors (LIFESTYLE) and health-related factors (HEALTH): The UK Biobank 2006–2021<sup>a</sup>.

|                                                                  | LIFESTYLE           |                       |                        |                     |                     |                      |
|------------------------------------------------------------------|---------------------|-----------------------|------------------------|---------------------|---------------------|----------------------|
|                                                                  | DIET                | PA                    | SMOKING                | ALCOHOL             | NUTR                | SS                   |
| <i>Main pathway</i>                                              |                     |                       |                        |                     |                     |                      |
| RACE_ETHN → SES (β <sub>12</sub> )                               | -0.351 ± 0.006***   | -0.350 ± 0.006***     | -0.350 ± 0.006***      | -0.351 ± 0.006***   | -0.351 ± 0.006***   | -0.351 ± 0.006***    |
| SES → LIFESTYLE (β <sub>23</sub> )                               | +0.192 ± 0.003***   | -0.059 ± 0.003***     | -0.152 ± 0.002***      | +0.305 ± 0.002***   | +0.102 ± 0.002***   | +0.086 ± 0.002***    |
| LIFESTYLE → HEALTH (β <sub>34</sub> )                            | -0.081 ± 0.001***   | -0.091 ± 0.001***     | +0.046 ± 0.002***      | -0.094 ± 0.001***   | -0.168 ± 0.002***   | -0.063 ± 0.002***    |
| HEALTH → DEMENTIA(β <sub>36</sub> )                              | +0.408 ± 0.019***   | +0.408 ± 0.019***     | +0.404 ± 0.019***      | +0.384 ± 0.019***   | +0.376 ± 0.020***   | +0.394 ± 0.020***    |
| <i>Selected direct effects on final outcomes</i>                 |                     |                       |                        |                     |                     |                      |
| RACE_ETHN → DEMENTIA(β <sub>16</sub> )                           | +0.092 ± 0.079      | +0.104 ± 0.078        | +0.101 ± 0.078         | +0.048 ± 0.079      | +0.050 ± 0.079      | +0.067 ± 0.079       |
| SES → DEMENTIA(β <sub>26</sub> )                                 | -0.284 ± 0.020***   | -0.278 ± 0.020***     | -0.281 ± 0.020***      | -0.255 ± 0.020***   | -0.272 ± 0.020***   | -0.265 ± 0.020***    |
| LIFESTYLE → DEMENTIA(β <sub>36</sub> )                           | 0.032 ± 0.014*      | +0.018 ± 0.013        | -0.017 ± 0.020         | -0.091 ± 0.014***   | -0.117 ± 0.017***   | -0.184 ± 0.021***    |
| <i>Other effects between endogenous variables</i>                |                     |                       |                        |                     |                     |                      |
| SES → HEALTH (β <sub>24</sub> )                                  | -0.211 ± 0.002***   | -0.232 ± 0.002***     | -0.219 ± 0.002***      | -0.198 ± 0.002***   | +0.102 ± 0.002***   | -0.221 ± 0.002***    |
| <i>Other direct effects of race</i>                              |                     |                       |                        |                     |                     |                      |
| RACE_ETHN → LIFESTYLE (β <sub>13</sub> )                         | +0.257 ± 0.009***   | -0.076 ± 0.009***     | -0.104 ± 0.007***      | -0.675 ± 0.009***   | -0.482 ± 0.007***   | -0.217 ± 0.006***    |
| RACE_ETHN → HEALTH(β <sub>14</sub> )                             | +0.093 ± 0.006***   | +0.065 ± 0.006***     | +0.077 ± 0.006***      | +0.009 ± 0.006      | -0.009 ± 0.006      | +0.059 ± 0.006***    |
| <i>Selected Indirect effects</i>                                 |                     |                       |                        |                     |                     |                      |
| RACE_ETHN → SES → DEMENTIA(β <sub>15</sub> )                     | +0.0998 ± 0.0073*** | +0.0977 ± 0.0070***   | +0.0987 ± 0.0073***    | +0.0896 ± 0.0073*** | +0.096 ± 0.007***   | +0.093 ± 0.007***    |
| RACE_ETHN → SES → LIFESTYLE → DEMENTIA(β <sub>8</sub> )          | -0.0022 ± 0.0009*   | +0.0004 ± 0.0003      | -0.0009 ± 0.0010       | +0.0097 ± 0.0014*** | +0.0042 ± 0.0006*** | +0.0055 ± 0.0007***  |
| RACE_ETHN → SES → LIFESTYLE → HEALTH → DEMENTIA(β <sub>c</sub> ) | +0.0022 ± 0.0001*** | -0.00076 ± 0.00005*** | +0.000991 ± 0.00006*** | +0.0039 ± 0.0002*** | +0.0023 ± 0.0001*** | +0.00075 ± 0.0000*** |
| TOTAL EFFECT OF RACE_ETHN                                        | +0.232 ± 0.078**    | +0.232 ± 0.078**      | +0.232 ± 0.078**       | +0.232 ± 0.078**    | +0.232 ± 0.078**    | +0.232 ± 0.078**     |

Abbreviations: AD: Alzheimer's Disease; ALCOHOL: Alcohol consumption z-score; COGN: Poor cognitive performance z-score; DIET: diet quality z-score; HEALTH: Poor cardio-metabolic and general health z-score; NUTR: Nutritional biomarker z-score; PA: Physical Activity z-score; RACE\_ETHN: Racial minority status (Non-White vs. White); SES: Socio-economic status z-score; SMOKING: Smoking z-score; SS: Social Support z-score. <sup>a</sup>Values are path coefficients β ± SE or non-linear combinations of path coefficients to compute selected indirect effects. → DEMENTIA associations are interpreted as Log<sub>e</sub>(HR) of these incident outcomes per unit exposure, as are total effects of RACE\_ETHN. \*P < 0.05 \*\*P < 0.01 \*\*\*P < 0.001 for null hypothesis of β = 0.
